# Supplementary material for: The Application of a Three-Step Proteome Analysis for Identification of New Biomarkers of Pancreatic Cancer
Source: PubMed Central journal article supplement (PMC3199071; doi:10.1155/2011/628787), 2011-10-17

## Supplemental Figures:

Supplemental figure a. Raw data of Isoform 1 of ficolin- 3 precursor

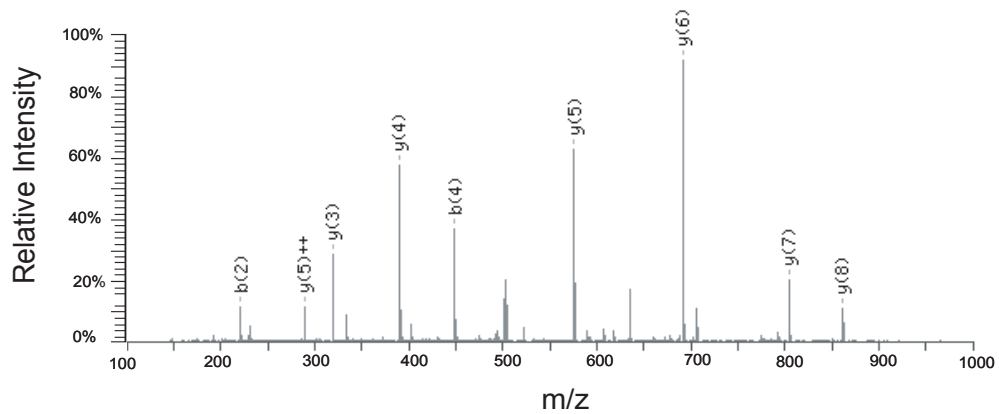

Supplemental Figure b. Raw data Corticosteroid-binding globulin precursor

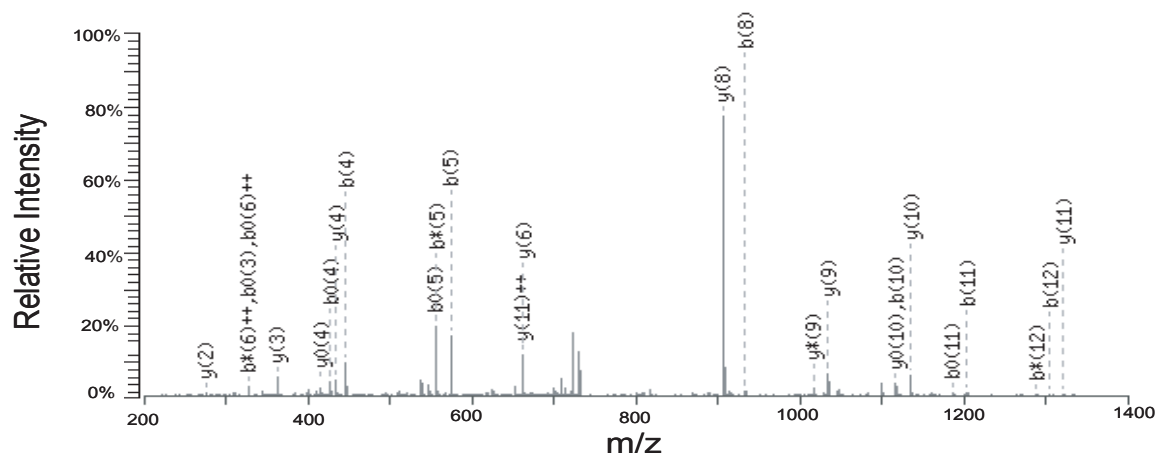

Supplemental Figure c. Raw data of Cholinesterase precursor

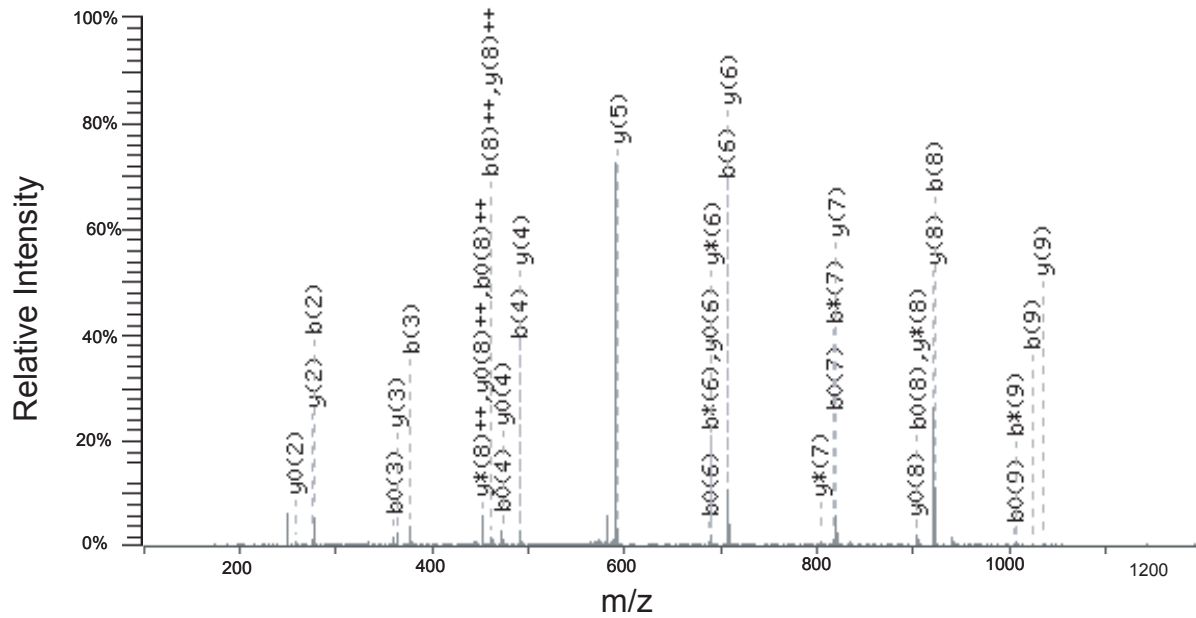

Supplemental Figure d. Raw data of AMBP protein precursor

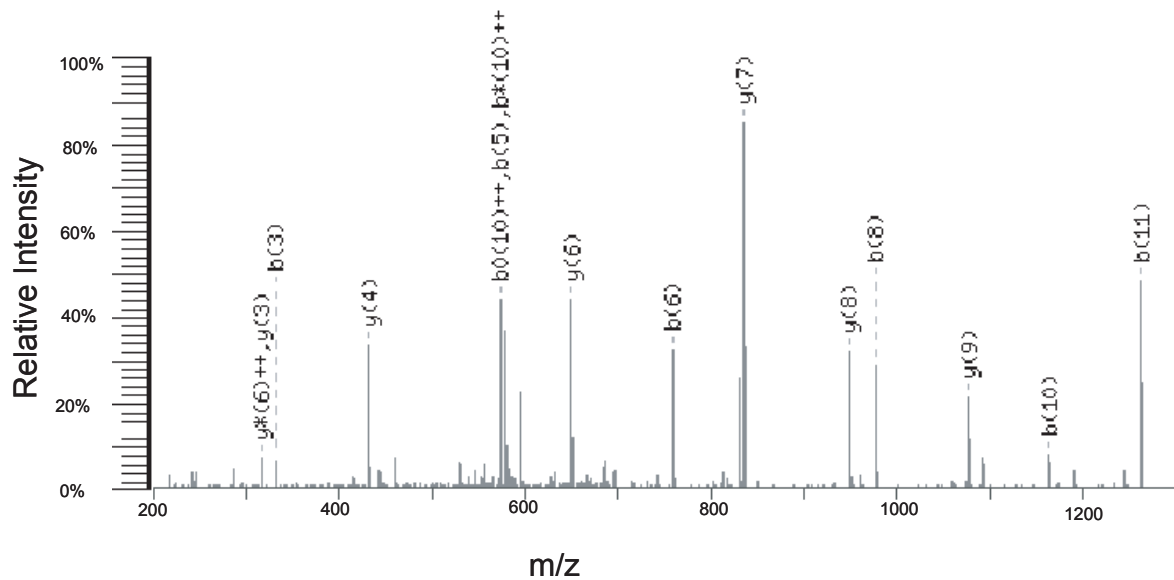

Supplemental Figure e. Raw data of Tetranectin precursor

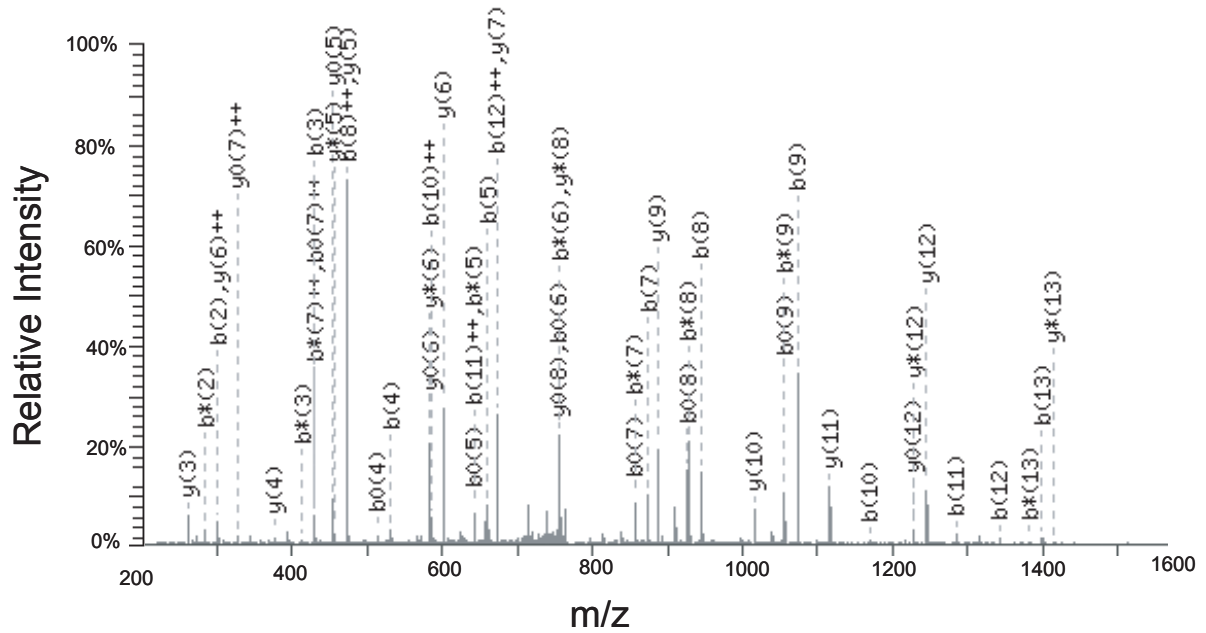

Supplemental Figure f. Raw data of Histone 4

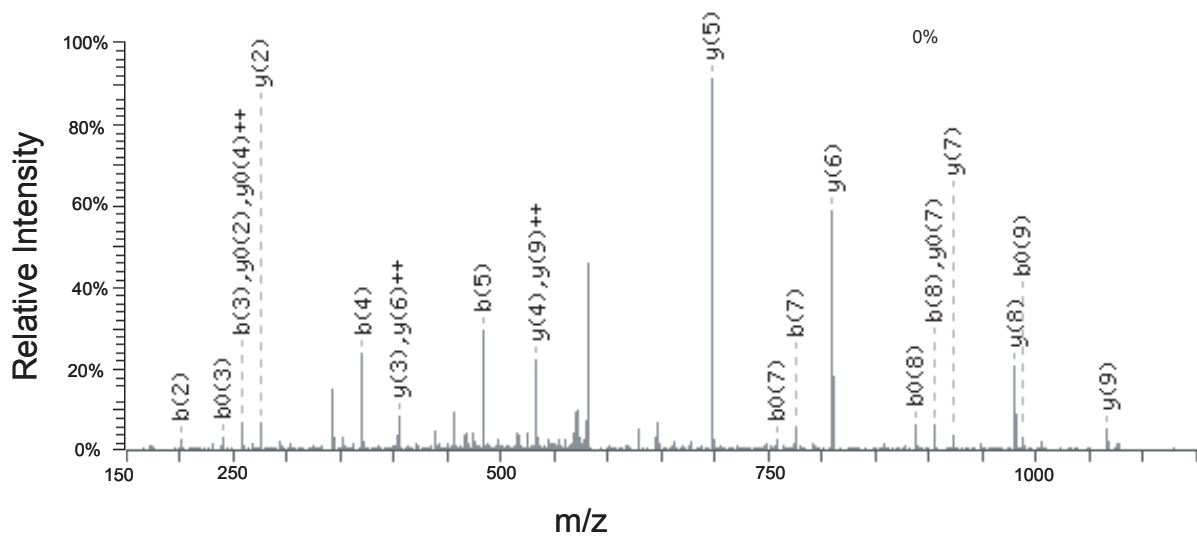

Supplement: 628787.f1.pdf [file 628787.f1.pdf]
